# Supplementary material for: Screen-printed back-to-back electroanalytical sensors
Source: Royal Society of Chemistry journal article supplement (doi:10.1039/c4an01501k), 2014-09-17
Supplement: c4an01501k1.pdf [file c4an01501k1.pdf]

Electronic Supporting Information

**ESI Figure 1**

Cyclic voltammograms recorded in 1 mM hexaammine-ruthenium (III) chloride / 0.1 M KCl at scan rates of 5 mV s<sup>-1</sup> (A) and 100 mV s<sup>-1</sup> (B) using a single MD-SPE (dotted line) and MD<sup>2</sup>-SPE (solid line).

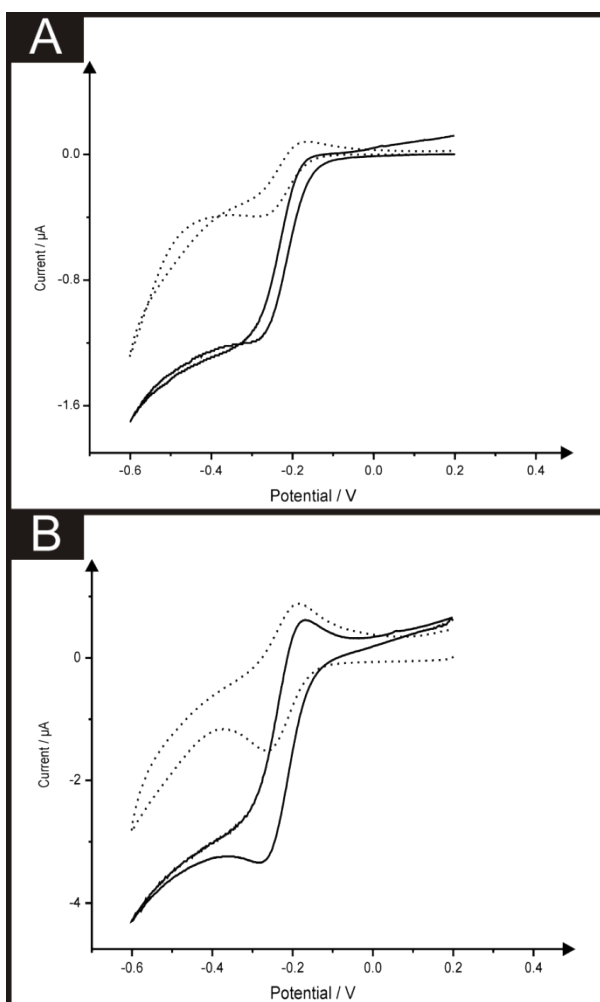

## ESI Figure 2

Cyclic voltammograms recorded in 1 mM hexaammine-ruthenium (III) chloride / 0.1 M KCl at scan rates of 5 mV s<sup>-1</sup> (A) and 100 mV s<sup>-1</sup> (B) using a single B-SPE (dotted line) and B<sup>2</sup>-SPE (solid line).

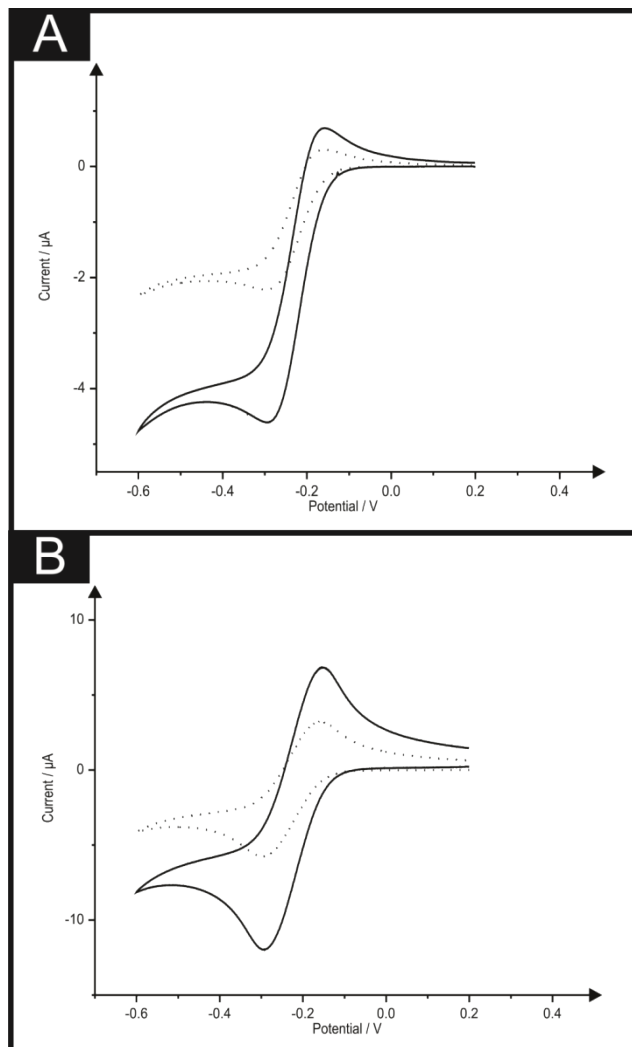

### ESI Figure 4

Potential width of the voltammetric signal corresponding from a non-Faradaic to Faradaic process. Image reproduced from reference [1].

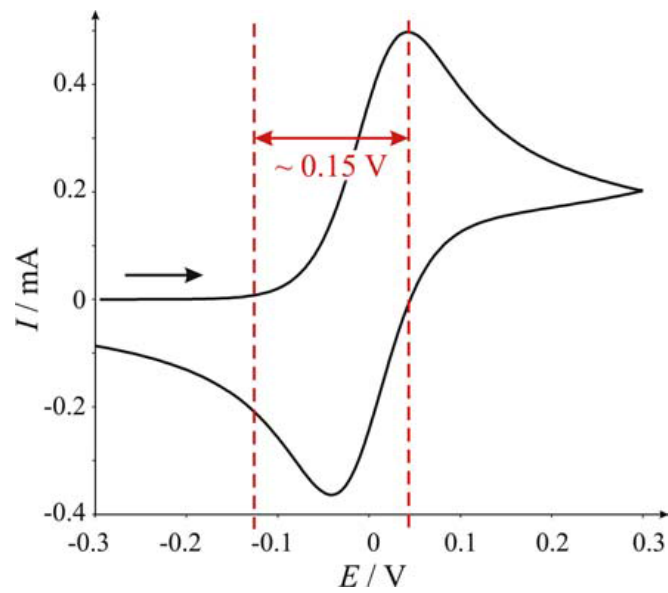

### ESI Figure 5

A comparison of cyclic voltammograms obtained in presence of 6  $\mu\text{M}$  NADH using the B-SPE (solid line) and B<sup>2</sup>-SPE (dashed line) and absence of NADH (dot and dot-dash lines respectively) in a solution of pH 7 phosphate buffer solution. Scan rate: 50  $\text{mV s}^{-1}$ .

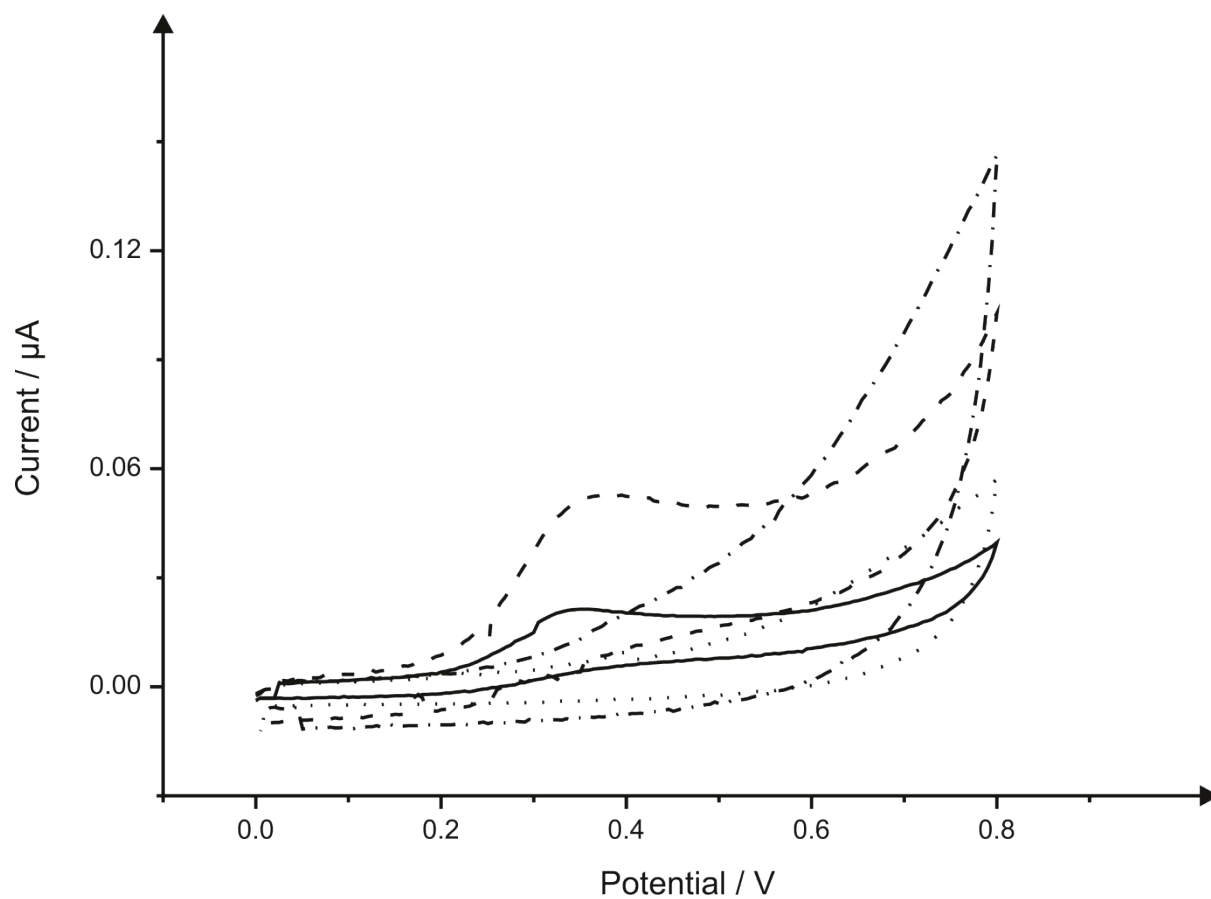

### ESI Figure 6

A comparison of cyclic voltammograms obtained in presence and absence of 60  $\mu\text{M}$  nitrite using the B-SPE, B<sup>2</sup>-SPE and B<sup>4</sup>-SPE in a solution of pH 7 phosphate buffer solution. Scan rate: 50  $\text{mV s}^{-1}$ . Key: With nitrite: B-SPE; solid line, B<sup>2</sup>-SPE; short dash-dot line, B<sup>4</sup>-SPE; short dash line. Without nitrite (blank): B-SPE; dashed line, B<sup>2</sup>-SPE; dotted line, B<sup>4</sup>-SPE; dot-dash line.

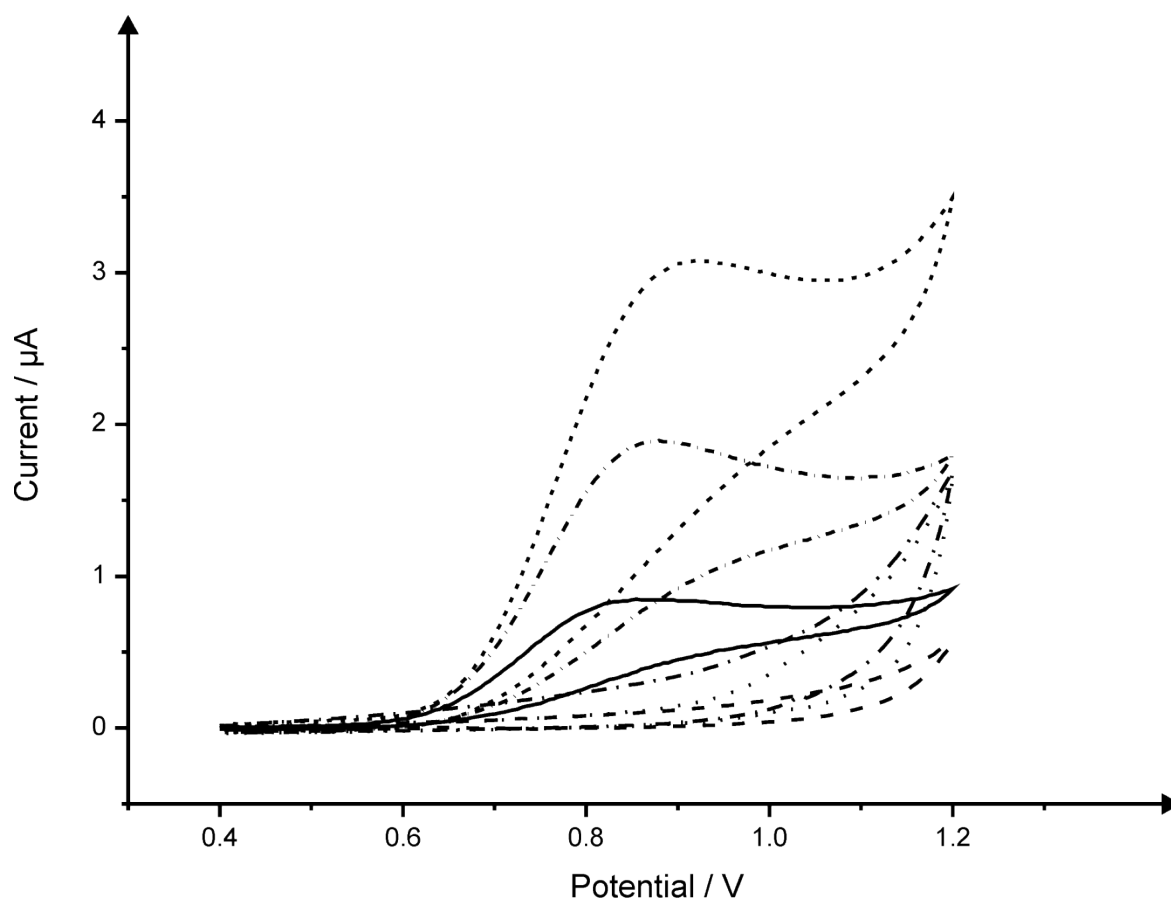

## References

1. T.J. Davies, C.E. Banks, R.G. Compton, *J Solid State Electrochem*, 2005, 9, 797
